# Supplementary material for: Association between baseline serum uric acid and development of LDL-C level in patients with first acute myocardial infarction
Source: Springer Nature journal article supplement (doi:10.1186/s12872-021-02383-x), 2021-11-30
Supplement: MOESM1 [file 19915166]

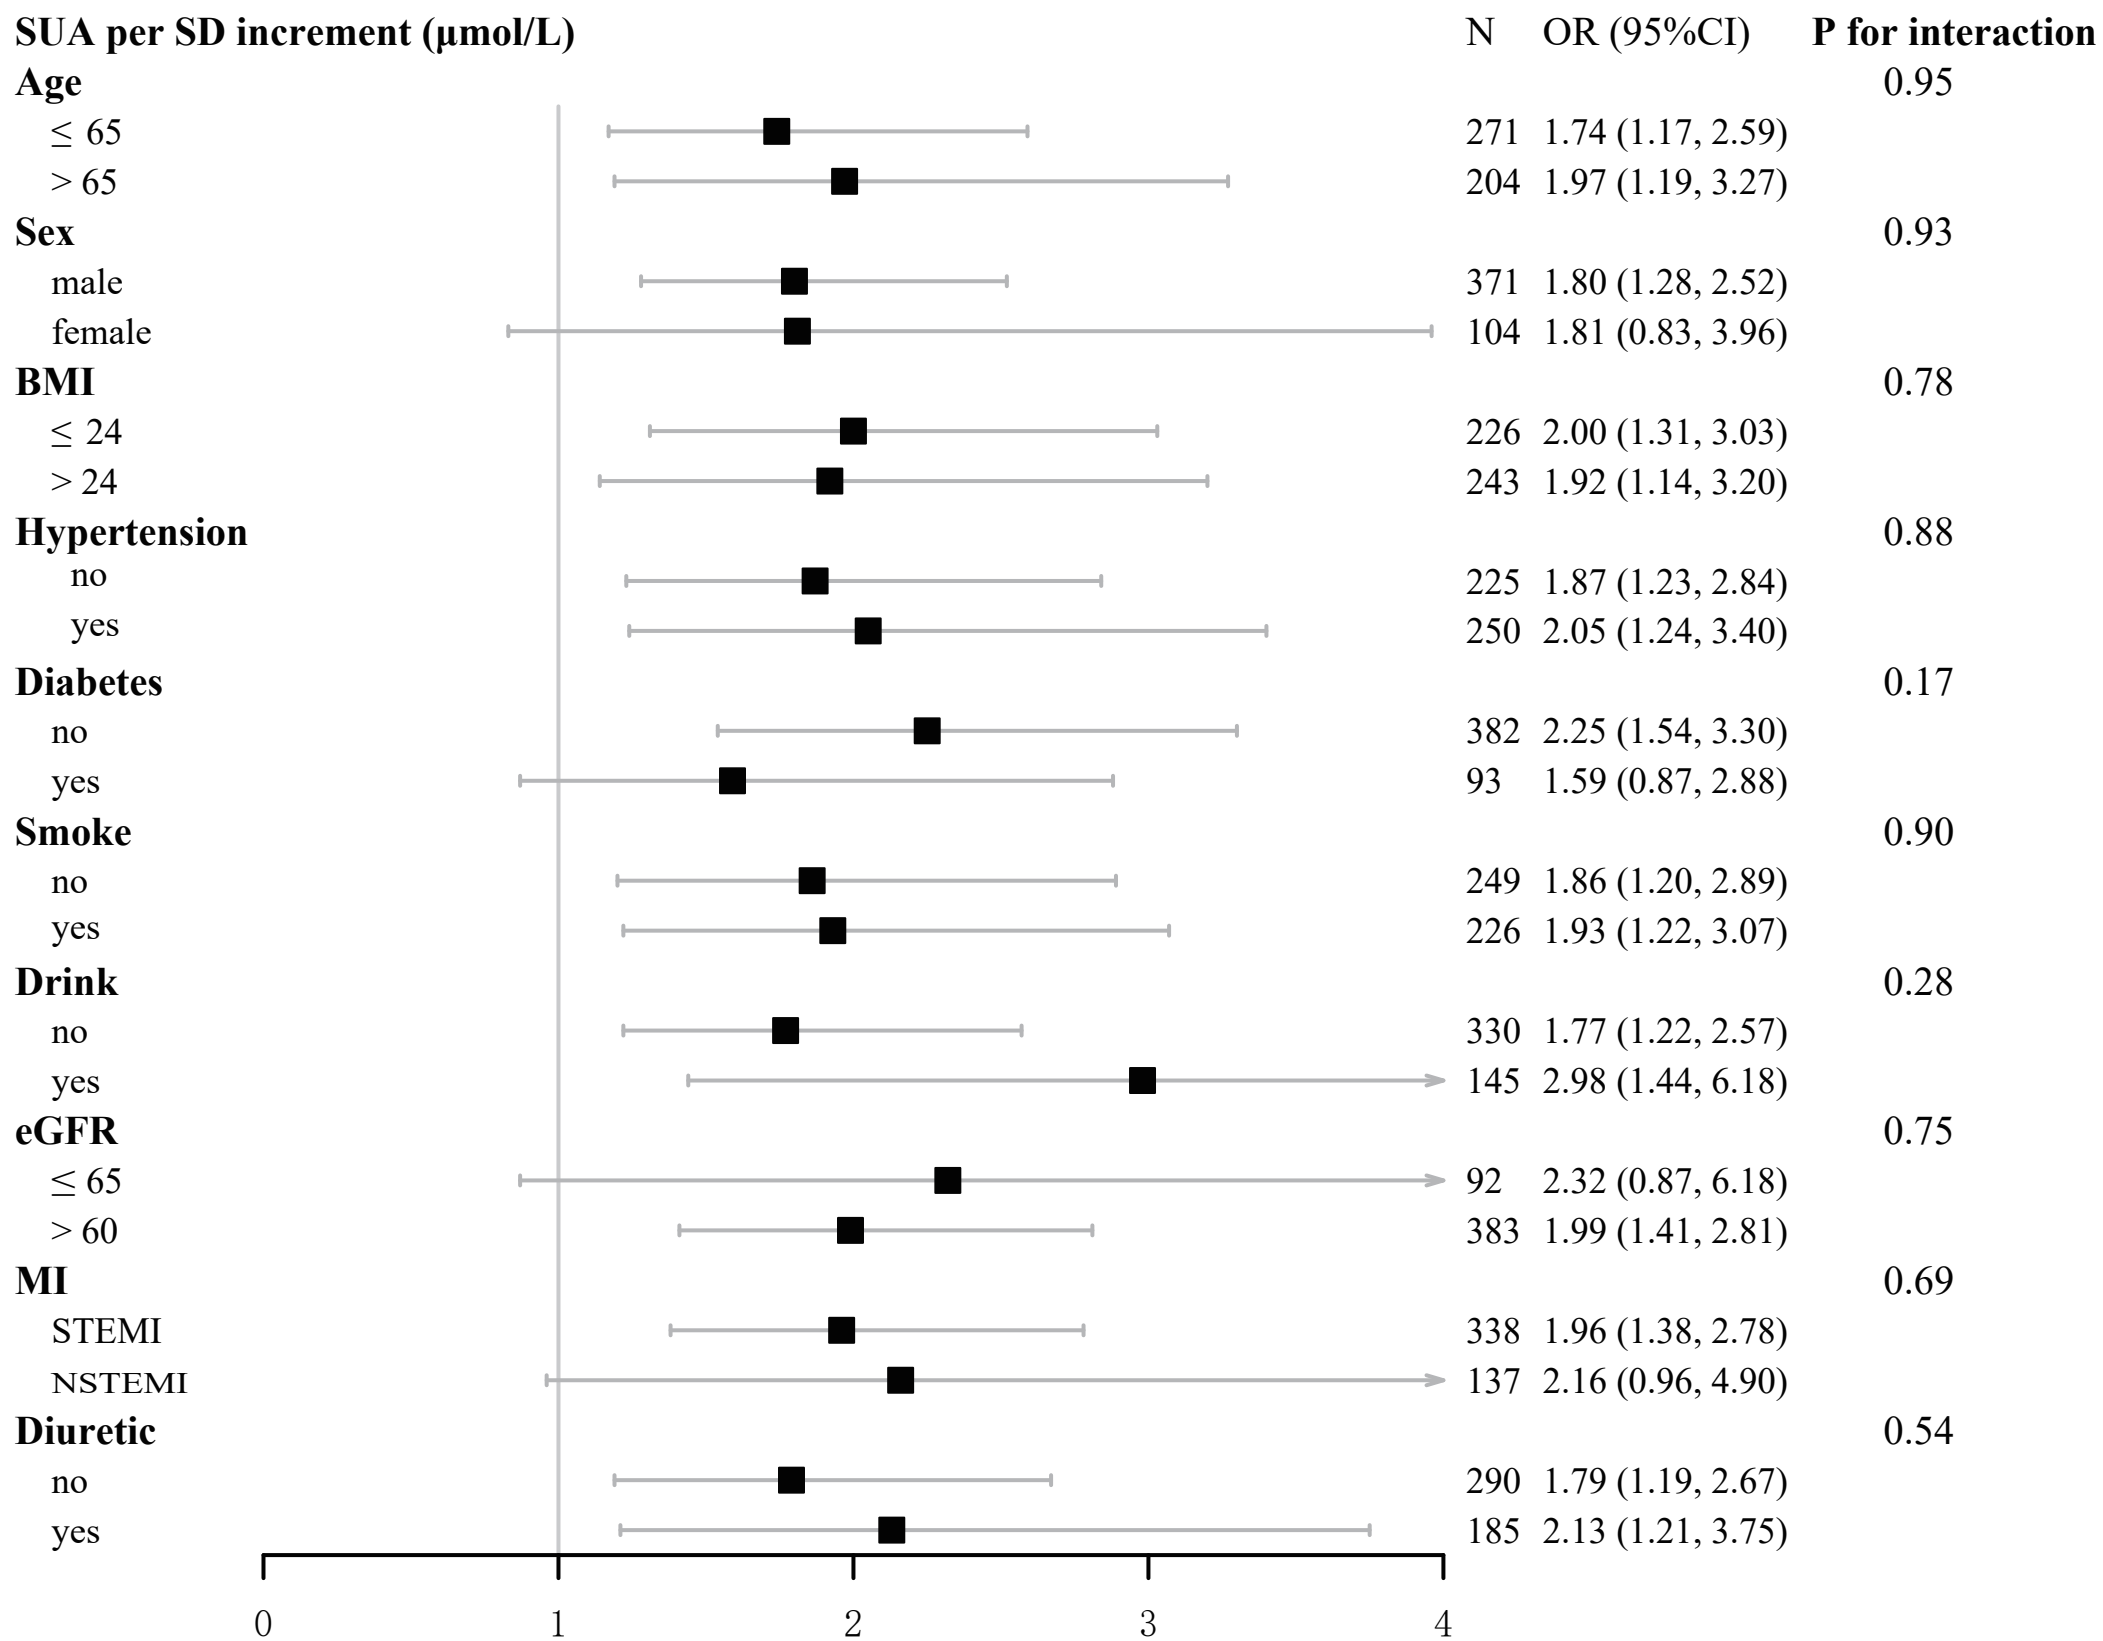

**Supplemental Figure 1. The association between baseline SUA and LDL-C control in various subgroups\*.**

\*Adjusted, if not stratified, for sex, BMI, age, hypertension, diabetes, smoke, drink, types of AMI, gout, TG, LDL-C, BUN, CRE, eGFR, AST, ALT, TBIL, statin use, uric acid lowering drugs, diuretics and  $\beta$  receptor blocker.
